# Supplementary material
Source: PubMed Central journal article supplement (PMC2082672)
Supplement: archdisch_adc.2005.075242_1.pdf [file archdisch_adc.2005.075242_1.pdf]

|              |                    |                  |
|--------------|--------------------|------------------|
| At diagnosis |                    |                  |
|              | 0                  | 10               |
|              | Did not understand | Fully understood |
| Now          |                    |                  |
|              | 0                  | 10               |
|              | Do not understand  | Fully understand |

If you didn't complete sperm banking, how far did you get? (please tick the appropriate box)

|                          |                          |  |
|--------------------------|--------------------------|--|
| Didn't get to St. Mary's | <input type="checkbox"/> |  |
| Got to St. Mary's        | <input type="checkbox"/> |  |
| Low sperm count          | <input type="checkbox"/> |  |

If you got to St. Mary's, what were your feelings about:

|                              |  |
|------------------------------|--|
| the room                     |  |
| the nursing staff            |  |
| the material provided        |  |
| the presence of your parents |  |

Describe how you feel now about your experience of sperm banking:

How easy do you find it to talk about fertility? Mark on the scale below.

|                            |                                      |
|----------------------------|--------------------------------------|
|                            |                                      |
| 0                          | 10                                   |
| find it easy to talk about | find it very difficult to talk about |

How would you describe your family's attitude to fertility? Mark on the scale below.

|                            |                                      |
|----------------------------|--------------------------------------|
|                            |                                      |
| 0                          | 10                                   |
| find it easy to talk about | find it very difficult to talk about |

Describe any other information which you feel is important

What would have made sperm banking easier for you?
